# Supplementary material for: Genome-wide detection of intervals of genetic heterogeneity associated with complex traits
Source: PubMed Central journal article supplement — Bioinformatics. 2015 Jun 10;31(12):i240–9. doi: 10.1093/bioinformatics/btv263 (PMC4559912; doi:10.1093/bioinformatics/btv263), 2015-06-10
Supplement: supp_btv263_Llinares-Lopez_281_sup_1.pdf [file supp_btv263_Llinares-Lopez_281_sup_1.pdf]

# Genome-wide detection of intervals of genetic heterogeneity underlying complex traits

Felipe Llinares-López, Dominik G. Grimm, Dean A. Bodenham  
Udo Gieraths, Mahito Sugiyama, Beth Rowan, Karsten Borgwardt

## S1 Supplementary Tables

| Phenotype Name | #Samples | %Cases | #SNPs   | $\delta_{\text{Bonferroni}}^*$ | $\delta_{\text{FAIS}}$ | $\delta_{\text{FAIS-WY}}$ |
|----------------|----------|--------|---------|--------------------------------|------------------------|---------------------------|
| Chlorosis 16   | 176      | 47.73  | 214 051 | 2.18e-12                       | 2.09e-08               | 1.70e-07                  |
| Chlorosis 10   | 177      | 15.82  | 214 051 | 2.18e-12                       | 1.52e-08               | 1.96e-07                  |
| Leaf roll 22   | 176      | 17.61  | 214 051 | 2.18e-12                       | 1.52e-08               | 1.85e-07                  |
| Emco5          | 86       | 80.23  | 214 044 | 2.18e-12                       | 2.41e-08               | 3.81e-07                  |
| Emoy           | 76       | 53.95  | 213 981 | 2.18e-12                       | 3.26e-08               | 3.13e-07                  |
| Hiks1          | 84       | 60.71  | 213 988 | 2.18e-12                       | 2.65e-08               | 2.56e-07                  |
| Noco2          | 87       | 55.17  | 214 043 | 2.18e-12                       | 2.96e-08               | 3.18e-07                  |
| Anthocyanin 16 | 176      | 39.77  | 214 051 | 2.18e-12                       | 1.90e-08               | 1.54e-07                  |
| Anthocyanin 10 | 177      | 18.64  | 214 051 | 2.18e-12                       | 1.52e-08               | 1.86e-07                  |
| Anthocyanin 22 | 177      | 36.16  | 214 051 | 2.18e-12                       | 1.85e-08               | 1.56e-07                  |
| Emwa1          | 85       | 62.35  | 214 042 | 2.18e-12                       | 2.64e-08               | 2.71e-07                  |
| <i>avrRpt2</i> | 89       | 80.9   | 214 032 | 2.18e-12                       | 2.40e-08               | 3.44e-07                  |
| <i>avrB</i>    | 87       | 63.22  | 214 032 | 2.18e-12                       | 2.48e-08               | 2.68e-07                  |
| Leaf roll 16   | 176      | 21.02  | 214 051 | 2.18e-12                       | 1.57e-08               | 1.77e-07                  |
| <i>avrRpm1</i> | 84       | 66.67  | 214 022 | 2.18e-12                       | 2.42e-08               | 2.99e-07                  |
| Chlorosis 22   | 176      | 62.5   | 214 051 | 2.18e-12                       | 1.85e-08               | 1.55e-07                  |
| Leaf roll 10   | 177      | 55.93  | 214 051 | 2.18e-12                       | 1.99e-08               | 1.74e-07                  |
| <i>avrPphB</i> | 90       | 51.11  | 214 032 | 2.18e-12                       | 3.16e-08               | 2.86e-07                  |
| LES            | 95       | 22.11  | 214 051 | 2.18e-12                       | 2.04e-08               | 3.32e-07                  |
| LY             | 95       | 30.53  | 214 051 | 2.18e-12                       | 2.17e-08               | 2.80e-07                  |
| YEL            | 95       | 8.42   | 214 051 | 2.18e-12                       | 4.64e-08               | 9.67e-07                  |

**Table S1:** Corrected significance threshold of FAIS ( $\delta_{\text{FAIS}}$ ), FAIS-WY ( $\delta_{\text{FAIS-WY}}$ ) and the exhaustive Bonferroni significance threshold ( $\delta_{\text{Bonferroni}}^*$ ).

| Description                                          | Phenotype                        | Chr      | Position | Ref     | Alt                 | MAF                 | snpEFF Effect       | Codon Change     | AA Change | Gene ID   | P-Value   |          |
|------------------------------------------------------|----------------------------------|----------|----------|---------|---------------------|---------------------|---------------------|------------------|-----------|-----------|-----------|----------|
| Hypersensitive Response                              | <i>avrB</i>                      | 3        | 2288913  | G       | T                   | 0.046               | 5 Prime UTR Variant |                  |           | AT3G07195 | 2.92E-01  |          |
|                                                      |                                  | 3        | 2289178  | T       | A                   | 0.23                | Intron Variant      |                  |           | AT3G07195 | 3.05E-05  |          |
|                                                      |                                  | 3        | 2289559  | T       | A                   | 0.356               | Synonymous Variant  | cgT/cgA          | Arg58Arg  | AT3G07195 | 1.94E-02  |          |
|                                                      | <i>avrPphB</i>                   | 1        | 4139802  | T       | C                   | 0.167               | Synonymous Variant  | agT/agC          | Ser455Ser | AT1G12200 | 1.62E-05  |          |
|                                                      |                                  | 1        | 4140044  | A       | T                   | 0.256               | Intergenic          |                  |           |           | 2.88E-07  |          |
|                                                      | <i>avrRpm1</i>                   | 3        | 2310055  | T       | G                   | 0.155               | Missense Variant    | Tgg/Ggg          | Trp118Gly | AT3G07260 | 2.78E-06  |          |
|                                                      |                                  | 3        | 2311035  | T       | G                   | 0.202               | Intergenic          |                  |           |           | 8.26E-02  |          |
|                                                      |                                  | 3        | 2311574  | C       | T                   | 0.179               | Intergenic          |                  |           |           | 1.28E-01  |          |
|                                                      | <i>avrRpt2</i>                   | 4        | 13231162 | T       | C                   | 0.247               | Intergenic          |                  |           |           | 1.02E-04  |          |
|                                                      |                                  | 4        | 13231999 | G       | T                   | 0.056               | Intergenic          |                  |           |           | 1.49E-04  |          |
| Leaf roll presence                                   | Leaf roll 10                     | 2        | 14018996 | A       | C                   | 0.079               | Synonymous Variant  | gcT/gcG          | Ala320Ala | AT2G33040 | 4.73E-02  |          |
|                                                      |                                  | 2        | 14019038 | A       | G                   | 0.085               | Synonymous Variant  | tcT/tcC          | Ser306Ser | AT2G33040 | 5.88E-01  |          |
|                                                      |                                  | 2        | 14019977 | G       | C                   | 0.096               | Missense Variant    | atC/atG          | Ile120Met | AT2G33040 | 3.71E-02  |          |
|                                                      |                                  | 2        | 14020898 | G       | T                   | 0.124               | Intergenic          |                  |           |           | 3.60E-01  |          |
|                                                      |                                  | 2        | 14021726 | G       | T                   | 0.079               | Intergenic          |                  |           |           | 1.60E-01  |          |
|                                                      |                                  | 2        | 14022076 | T       | A                   | 0.124               | Synonymous Variant  | ctT/ctA          | Leu69Leu  | AT2G33050 | 5.26E-03  |          |
|                                                      |                                  | 2        | 14023462 | A       | T                   | 0.079               | Synonymous Variant  | tcA/tcT          | Ser531Ser | AT2G33050 | 1.60E-01  |          |
|                                                      |                                  | 2        | 14023726 | A       | T                   | 0.294               | Synonymous Variant  | atA/atT          | Ile619Ile | AT2G33050 | 8.19E-03  |          |
|                                                      |                                  | 2        | 14023855 | C       | G                   | 0.09                | Missense Variant    | agC/agG          | Ser662Arg | AT2G33050 | 6.18E-02  |          |
|                                                      |                                  | 2        | 14023969 | C       | A                   | 0.085               | Synonymous Variant  | ctC/ctA          | Leu700Leu | AT2G33050 | 1.01E-01  |          |
|                                                      |                                  | 2        | 14024162 | C       | T                   | 0.09                | Missense Variant    | Ctt/Ttt          | Leu765Phe | AT2G33050 | 6.18E-02  |          |
|                                                      |                                  | 2        | 14024485 | C       | A                   | 0.09                | Intergenic          |                  |           |           | 6.18E-02  |          |
|                                                      | 2                                | 14025154 | T        | G       | 0.085               | Intergenic          |                     |                  |           | 1.01E-01  |           |          |
|                                                      | 2                                | 14025341 | A        | G       | 0.147               | Intergenic          |                     |                  |           | 5.76E-02  |           |          |
|                                                      | 2                                | 14025518 | T        | G       | 0.356               | 5 Prime UTR Variant |                     |                  |           | AT2G33060 | 4.88E-04  |          |
|                                                      | 2                                | 18040355 | A        | G       | 0.136               | Intergenic          |                     |                  |           |           | 6.14E-04  |          |
|                                                      | 5                                | 18040400 | C        | T       | 0.188               | Intergenic          |                     |                  |           |           | 1.75E-03  |          |
|                                                      | Presence or absence of lesioning | LES      | 4        | 8307440 | T                   | G                   | 0.389               | Missense Variant | Aaa/Caa   | Lys75Gln  | AT4G14440 | 2.26E-04 |
| 4                                                    |                                  |          | 8307761  | A       | T                   | 0.147               | Intergenic          |                  |           |           | 1.82E-01  |          |
| 4                                                    |                                  |          | 8307910  | T       | A                   | 0.232               | Intergenic          |                  |           |           | 1.42E-01  |          |
| 4                                                    |                                  |          | 8308076  | A       | G                   | 0.368               | Intergenic          |                  |           |           | 4.02E-03  |          |
| 4                                                    |                                  |          | 8308306  | T       | A                   | 0.074               | Intergenic          |                  |           |           | 3.42E-01  |          |
| 4                                                    |                                  |          | 8308768  | T       | A                   | 0.042               | Intergenic          |                  |           |           | 5.72E-01  |          |
| 4                                                    |                                  |          | 8308977  | C       | A                   | 0.295               | Intergenic          |                  |           |           | 2.88E-01  |          |
| Presence or absence of either lesioning or yellowing | LY                               | 1        | 18192753 | G       | A                   | 0.253               | Missense Variant    | gGc/gAc          | Gly406Asp | AT1G49190 | 3.87E-02  |          |
|                                                      |                                  | 1        | 18192956 | C       | A                   | 0.263               | Intron Variant      |                  |           |           | 7.99E-02  |          |
|                                                      |                                  | 1        | 18193152 | A       | C                   | 0.211               | Intron Variant      |                  |           |           | AT1G49190 | 2.83E-04 |
|                                                      |                                  | 1        | 18196934 | C       | G                   | 0.284               | Intergenic          |                  |           |           | 4.80E-02  |          |
| Presence or absence of yellowing                     | YEL                              | 3        | 20137884 | C       | A                   | 0.495               | 3 Prime UTR Variant |                  |           | AT3G54390 | 5.69E-03  |          |
|                                                      |                                  | 3        | 20139860 | T       | G                   | 0.358               | Intergenic          |                  |           |           | 2.52E-01  |          |
|                                                      |                                  | 3        | 20142484 | A       | G                   | 0.211               | Missense Variant    | cTa/cCa          | Leu39Pro  | AT3G54400 | 1.97E-01  |          |
|                                                      |                                  | 3        | 20143997 | T       | G                   | 0.421               | Intergenic          |                  |           |           | 1.33E-01  |          |
|                                                      |                                  | 3        | 20144047 | C       | G                   | 0.053               | Intergenic          |                  |           |           | 1.00E+00  |          |
|                                                      |                                  | 3        | 20144480 | A       | C                   | 0.411               | Intergenic          |                  |           |           | 1.93E-02  |          |
| Visual anthocyanin presence                          | Anthocyanin 10                   | 1        | 5951857  | G       | T                   | 0.085               | Synonymous Variant  | ctC/ctA          | Leu415Leu | AT1G17370 | 7.71E-02  |          |
|                                                      |                                  | 1        | 5952292  | A       | G                   | 0.362               | Synonymous Variant  | ttT/ttC          | Phe301Phe | AT1G17370 | 3.21E-05  |          |
|                                                      |                                  | 1        | 5954613  | T       | A                   | 0.119               | Intron Variant      |                  |           |           | AT1G17370 | 7.69E-01 |
|                                                      | Anthocyanin 16                   | 2        | 1702970  | A       | G                   | 0.057               | Synonymous Variant  | gtT/gtC          | Val106Val | AT2G04845 | 6.46E-03  |          |
|                                                      |                                  | 2        | 1703341  | A       | T                   | 0.091               | Intron Variant      |                  |           |           | AT2G04845 | 2.96E-03 |
|                                                      |                                  | 2        | 1703427  | G       | A                   | 0.136               | Synonymous Variant  | gtC/gtT          | Val70Val  | AT2G04845 | 1.35E-02  |          |
|                                                      |                                  | 2        | 1703930  | T       | A                   | 0.091               | Missense Variant    | Atg/Ttg          | Met22Leu  | AT2G04845 | 2.96E-03  |          |
|                                                      | Anthocyanin 22                   | 1        | 14037978 | A       | G                   | 0.254               | Intergenic          |                  |           |           | 1.14E-02  |          |
|                                                      |                                  | 1        | 14039321 | T       | C                   | 0.35                | Intergenic          |                  |           |           | 7.43E-01  |          |
|                                                      |                                  | 1        | 14040254 | C       | A                   | 0.232               | Intergenic          |                  |           |           | 1.52E-02  |          |
| 1                                                    | 14040529                         | G        | A        | 0.237   | Intergenic          |                     |                     |                  | 9.68E-03  |           |           |          |
| Visual Chlorosis precense                            | Chlorosis 22                     | 3        | 9825219  | T       | G                   | 0.176               | Missense Variant    | Ttg/Gtg          | Leu400Val | AT3G26730 | 1.98E-04  |          |
|                                                      |                                  | 3        | 9825306  | T       | C                   | 0.17                | Synonymous Variant  | Ttg/Ctg          | Leu429Leu | AT3G26730 | 6.86E-04  |          |
|                                                      |                                  | 3        | 9825506  | A       | T                   | 0.034               | Synonymous Variant  | tcA/tcT          | Ser495Ser | AT3G26730 | 1.99E-01  |          |
|                                                      |                                  | 3        | 9825646  | G       | A                   | 0.176               | Intron Variant      |                  |           |           | AT3G26730 | 1.98E-04 |
|                                                      |                                  | 3        | 9825765  | A       | T                   | 0.188               | Intron Variant      |                  |           |           | AT3G26730 | 1.15E-03 |
|                                                      |                                  | 3        | 9826159  | A       | C                   | 0.176               | Intron Variant      |                  |           |           | AT3G26730 | 1.98E-04 |
|                                                      |                                  | 3        | 9826344  | G       | C                   | 0.244               | Intron Variant      |                  |           |           | AT3G26730 | 2.05E-01 |
|                                                      |                                  | 3        | 9827153  | T       | A                   | 0.239               | Missense Variant    | ttT/ttA          | Phe734Leu | AT3G26730 | 1.45E-01  |          |
|                                                      |                                  | 3        | 9829739  | A       | T                   | 0.25                | Intergenic          |                  |           |           | 1.10E-01  |          |
|                                                      |                                  | 3        | 9829837  | G       | A                   | 0.415               | Intergenic          |                  |           |           | 6.38E-01  |          |
| 3                                                    | 9831240                          | A        | T        | 0.29    | 5 Prime UTR Variant |                     |                     |                  | AT3G26742 | 2.53E-02  |           |          |
| Visual Chlorosis precense                            | Emwa1                            | 1        | 5779265  | T       | C                   | 0.071               | Synonymous Variant  | aaA/aaG          | Lys570Lys | AT1G16900 | 2.07E-03  |          |
|                                                      |                                  | 1        | 5779815  | C       | T                   | 0.118               | Synonymous Variant  | tcG/tcA          | Ser447Ser | AT1G16900 | 3.66E-02  |          |
|                                                      |                                  | 1        | 5780043  | C       | T                   | 0.141               | Missense Variant    | Gca/Aca          | Ala429Thr | AT1G16900 | 5.37E-05  |          |

**Table S2:** snpEFF annotation of the most significant intervals that do not contain a significant SNP found by an univariate Fisher exact test. For each individual SNP, the  $p$ -value obtained from the univariate Fisher exact test is displayed in the right-most column.

| Description                                          | Phenotype      | Chr          | Position | Ref      | Alt        | MAF        | snpEFF Effect       | Codon Change | AA Change | Gene ID   | P-Value   |          |
|------------------------------------------------------|----------------|--------------|----------|----------|------------|------------|---------------------|--------------|-----------|-----------|-----------|----------|
| Hypersensitive Response                              | <i>avrB</i>    | 3            | 2288913  | G        | T          | 0.046      | 5 Prime UTR Variant |              |           | AT3G07195 | 2.92E-01  |          |
|                                                      |                | 3            | 2289178  | T        | A          | 0.23       | Intron Variant      |              |           | AT3G07195 | 3.05E-05  |          |
|                                                      |                | 3            | 2289559  | T        | A          | 0.356      | Synonymous Variant  | cgT/cgA      | Arg58Arg  | AT3G07195 | 1.94E-02  |          |
|                                                      | <i>avrPphB</i> | 1            | 4129510  | T        | C          | 0.189      | Synonymous Variant  | tcA/tcG      | Ser64Ser  | AT1G12170 | 1.00E-06  |          |
|                                                      |                | 1            | 4130384  | A        | T          | 0.078      | Intergenic          |              |           |           | 5.13E-03  |          |
|                                                      | <i>avrRpm1</i> | 3            | 2310055  | T        | G          | 0.155      | Missense Variant    | Tgg/Ggg      | Trp118Gly | AT3G07260 | 2.78E-06  |          |
|                                                      |                | 3            | 2311035  | T        | G          | 0.202      | Intergenic          |              |           |           | 8.26E-02  |          |
|                                                      |                | 3            | 2311574  | C        | T          | 0.179      | Intergenic          |              |           |           | 1.28E-01  |          |
|                                                      | <i>avrRpt2</i> | 4            | 12279427 | T        | C          | 0.133      | Missense Variant    | aTg/aCg      | Met86Thr  | AT4G23530 | 9.40E-03  |          |
|                                                      |                | 4            | 12280837 | G        | C          | 0.133      | 3 Prime UTR Variant |              |           | AT4G23530 | 1.12E-04  |          |
| Leaf roll presence                                   | Leaf roll 10   | 2            | 14018996 | A        | C          | 0.079      | Synonymous Variant  | gcT/gcG      | Ala320Ala | AT2G33040 | 4.73E-02  |          |
|                                                      |                | 2            | 14019038 | A        | G          | 0.085      | Synonymous Variant  | tcT/tcC      | Ser306Ser | AT2G33040 | 5.88E-01  |          |
|                                                      |                | 2            | 14019977 | G        | C          | 0.096      | Missense Variant    | atC/atG      | Ile120Met | AT2G33040 | 3.71E-02  |          |
|                                                      |                | 2            | 14020898 | G        | T          | 0.124      | Intergenic          |              |           |           | 3.60E-01  |          |
|                                                      |                | 2            | 14021726 | G        | T          | 0.079      | Intergenic          |              |           |           | 1.60E-01  |          |
|                                                      |                | 2            | 14022076 | T        | A          | 0.124      | Synonymous Variant  | ctT/ctA      | Leu69Leu  | AT2G33050 | 5.26E-03  |          |
|                                                      |                | 2            | 14023462 | A        | T          | 0.079      | Synonymous Variant  | tcA/tcT      | Ser531Ser | AT2G33050 | 1.60E-01  |          |
|                                                      |                | 2            | 14023726 | A        | T          | 0.294      | Synonymous Variant  | atA/atT      | Ile619Ile | AT2G33050 | 8.19E-03  |          |
|                                                      |                | 2            | 14023855 | C        | G          | 0.09       | Missense Variant    | agC/agG      | Ser662Arg | AT2G33050 | 6.18E-02  |          |
|                                                      |                | 2            | 14023969 | C        | A          | 0.085      | Synonymous Variant  | ctC/ctA      | Leu700Leu | AT2G33050 | 1.01E-01  |          |
|                                                      |                | 2            | 14024162 | C        | T          | 0.09       | Missense Variant    | Ctt/Ttt      | Leu765Phe | AT2G33050 | 6.18E-02  |          |
|                                                      |                | 2            | 14024485 | C        | A          | 0.09       | Intergenic          |              |           |           | 6.18E-02  |          |
|                                                      |                | 2            | 14025154 | T        | G          | 0.085      | Intergenic          |              |           |           | 1.01E-01  |          |
|                                                      |                | 2            | 14025341 | A        | G          | 0.147      | Intergenic          |              |           |           | 5.76E-02  |          |
|                                                      |                | 2            | 14025518 | T        | G          | 0.356      | 5 Prime UTR Variant |              |           |           | AT2G33060 | 4.88E-04 |
|                                                      |                | Leaf roll 16 | 5        | 18040355 | A          | G          | 0.136               | Intergenic   |           |           |           | 6.14E-04 |
| 5                                                    | 18040400       |              | C        | T        | 0.188      | Intergenic |                     |              |           | 1.75E-03  |           |          |
| Presence or absence of lesioning                     | LES            | 5            | 6528991  | T        | G          | 0.105      | Missense Variant    | Aaa/Caa      | Lys164Gln | AT5G19380 | 5.70E-05  |          |
|                                                      |                | 5            | 6529733  | G        | C          | 0.053      | Intron Variant      |              |           |           | 3.05E-01  |          |
|                                                      |                | 5            | 6531656  | C        | A          | 0.105      | 5 Prime UTR Variant |              |           | AT5G19390 | 6.98E-03  |          |
| Presence or absence of either lesioning or yellowing | LY             | 1            | 18192753 | G        | A          | 0.253      | Missense Variant    | gGc/gAc      | Gly406Asp | AT1G49190 | 3.87E-02  |          |
|                                                      |                | 1            | 18192956 | C        | A          | 0.263      | Intron Variant      |              |           | AT1G49190 | 7.99E-02  |          |
|                                                      |                | 1            | 18193152 | A        | C          | 0.211      | Intron Variant      |              |           | AT1G49190 | 2.83E-04  |          |
|                                                      |                | 1            | 18196934 | C        | G          | 0.284      | Intergenic          |              |           |           | 4.80E-02  |          |
| Presence or absence of yellowing                     | YEL            | 3            | 20137884 | C        | A          | 0.495      | 3 Prime UTR Variant |              |           | AT3G54390 | 5.69E-03  |          |
|                                                      |                | 3            | 20139860 | T        | G          | 0.358      | Intergenic          |              |           |           | 2.52E-01  |          |
|                                                      |                | 3            | 20142484 | A        | G          | 0.211      | Missense Variant    | cTa/cCa      | Leu39Pro  | AT3G54400 | 1.97E-01  |          |
|                                                      |                | 3            | 20143997 | T        | G          | 0.421      | Intergenic          |              |           |           | 1.33E-01  |          |
|                                                      |                | 3            | 20144047 | C        | G          | 0.053      | Intergenic          |              |           |           | 1.00E+00  |          |
|                                                      |                | 3            | 20144480 | A        | C          | 0.411      | Intergenic          |              |           |           | 1.93E-02  |          |
| Visual anthocyanin presence                          | Anthocyanin 10 | 1            | 5951857  | G        | T          | 0.085      | Synonymous Variant  | ctC/ctA      | Leu415Leu | AT1G17370 | 7.71E-02  |          |
|                                                      |                | 1            | 5952292  | A        | G          | 0.362      | Synonymous Variant  | ttT/ttC      | Phe301Phe | AT1G17370 | 3.21E-05  |          |
|                                                      |                | 1            | 5954613  | T        | A          | 0.119      | Intron Variant      |              |           | AT1G17370 | 7.69E-01  |          |
|                                                      | Anthocyanin 16 | 2            | 1702970  | A        | G          | 0.057      | Synonymous Variant  | gtT/gtC      | Val106Val | AT2G04845 | 6.46E-03  |          |
|                                                      |                | 2            | 1703341  | A        | T          | 0.091      | Intron Variant      |              |           | AT2G04845 | 2.96E-03  |          |
|                                                      |                | 2            | 1703427  | G        | A          | 0.136      | Synonymous Variant  | gtC/gtT      | Val70Val  | AT2G04845 | 1.35E-02  |          |
|                                                      |                | 2            | 1703930  | T        | A          | 0.091      | Missense Variant    | Atg/Ttg      | Met22Leu  | AT2G04845 | 2.96E-03  |          |
|                                                      | Anthocyanin 22 | 1            | 14037978 | A        | G          | 0.254      | Intergenic          |              |           |           | 1.14E-02  |          |
|                                                      |                | 1            | 14039321 | T        | C          | 0.35       | Intergenic          |              |           |           | 7.43E-01  |          |
|                                                      |                | 1            | 14040254 | C        | A          | 0.232      | Intergenic          |              |           |           | 1.52E-02  |          |
| 1                                                    | 14040529       | G            | A        | 0.237    | Intergenic |            |                     |              | 9.68E-03  |           |           |          |
| Visual Chlorosis precense                            | Chlorosis 22   | 3            | 9825219  | T        | G          | 0.176      | Missense Variant    | Ttg/Gtg      | Leu400Val | AT3G26730 | 1.98E-04  |          |
|                                                      |                | 3            | 9825306  | T        | C          | 0.17       | Synonymous Variant  | Ttg/Ctg      | Leu429Leu | AT3G26730 | 6.86E-04  |          |
|                                                      |                | 3            | 9825506  | A        | T          | 0.034      | Synonymous Variant  | tcA/tcT      | Ser495Ser | AT3G26730 | 1.99E-01  |          |
|                                                      |                | 3            | 9825646  | G        | A          | 0.176      | Intron Variant      |              |           | AT3G26730 | 1.98E-04  |          |
|                                                      |                | 3            | 9825765  | A        | T          | 0.188      | Intron Variant      |              |           | AT3G26730 | 1.15E-03  |          |
|                                                      |                | 3            | 9826159  | A        | C          | 0.176      | Intron Variant      |              |           | AT3G26730 | 1.98E-04  |          |
|                                                      |                | 3            | 9826344  | G        | C          | 0.244      | Intron Variant      |              |           | AT3G26730 | 2.05E-01  |          |
|                                                      |                | 3            | 9827153  | T        | A          | 0.239      | Missense Variant    | ttT/ttA      | Phe734Leu | AT3G26730 | 1.45E-01  |          |
|                                                      |                | 3            | 9829739  | A        | T          | 0.25       | Intergenic          |              |           |           | 1.10E-01  |          |
|                                                      |                | 3            | 9829837  | G        | A          | 0.415      | Intergenic          |              |           |           | 6.38E-01  |          |
|                                                      |                | 3            | 9831240  | A        | T          | 0.29       | 5 Prime UTR Variant |              |           |           | AT3G26742 | 2.53E-02 |
| Visual Chlorosis precense                            | Emwa1          | 1            | 5779265  | T        | C          | 0.071      | Synonymous Variant  | aaA/aaG      | Lys570Lys | AT1G16900 | 2.07E-03  |          |
|                                                      |                | 1            | 5779815  | C        | T          | 0.118      | Synonymous Variant  | tcG/tcA      | Ser447Ser | AT1G16900 | 3.66E-02  |          |
|                                                      |                | 1            | 5780043  | C        | T          | 0.141      | Missense Variant    | Gca/Aca      | Ala429Thr | AT1G16900 | 5.37E-05  |          |

**Table S3:** snpEFF annotation of the most significant intervals that do not contain or are in close proximity ( $\pm 10kb$ ) to a significant SNP found by an univariate Fisher exact test or a linear mixed model. For each individual SNP, the  $p$ -value obtained from the univariate Fisher exact test is displayed in the right-most column. Rows in blue are different intervals then identified using the filtering Scenario 2.

## S2 Supplementary Figures

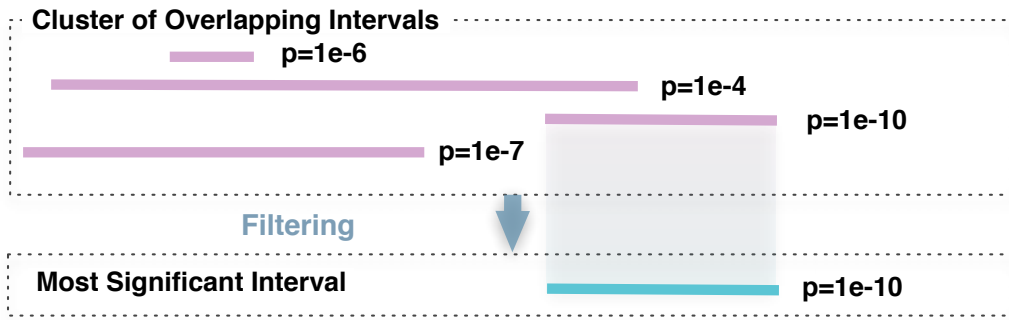

**Figure S1:** A schematic representation of the filtering procedure. In each cluster of overlapping intervals, the interval with smallest p-value is the result.

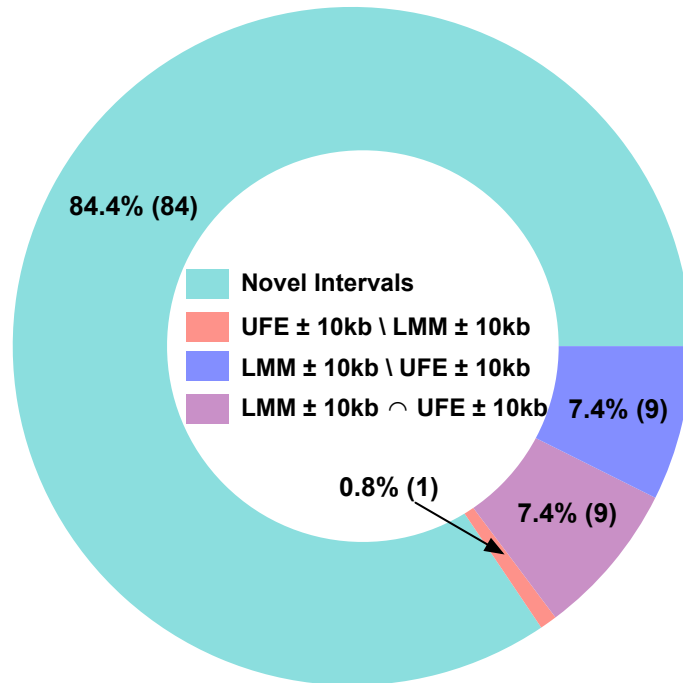

**Figure S2:** Proportion of novel intervals among all intervals found by FAIS-WY for the phenotype YEL with the highest degree of population structure. The green part shows the proportion of novel intervals found by FAIS-WY. The red part (UFE  $\pm$  10kb \ LMM  $\pm$  10kb) are intervals containing an UFE hit or are in close proximity ( $\pm$  10kb) to one and the hit could not be found with a LMM. The blue part (LMM  $\pm$  10kb \ UFE  $\pm$  10kb) are intervals containing a LMM hit or are in close proximity ( $\pm$  10kb) to one and the hit could not be found with an UFE. The purple part (LMM  $\pm$  10kb  $\cap$  UFE  $\pm$  10kb) are intervals that contain both, a hit ( $\pm$  10kb) found with an UFE and a LMM.

### S3 Simulation study: additional results

The supplementary figures in this section may aid in our discussion of the performance of FAIS and FAIS-WY. In all figures in this section,  $\alpha = 0.05$ .

#### S3.1 Speed, as the number of permutations varies

Figure S3 shows how the speed of FAIS-WY varies as the number of permutations  $J$  increases. Of course, FAIS does not vary, since it does not use Westfall-Young permutations, but is displayed for comparison purposes. The relationship appears to be approximately linear (speed vs number of permutations,  $J$ ). This shows that if the simulation that produced Figure 4 (in the main text) used a larger number of permutations, there would be a larger difference in the (raw) times between FAIS and FAIS-WY.

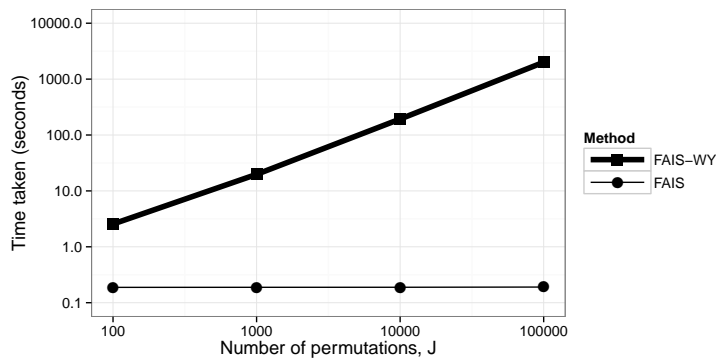

**Figure S3:** A figure comparing the speed of FAIS and FAIS-WY as the number of permutations varies. Of course, FAIS does not vary, but is displayed for comparison purposes. Note that the axes are log-scaled (base 10). Other parameter values:  $n=100$ ,  $L=11000$ .

### S3.2 Speed, as the number of individuals varies

Figure S4 shows how the speeds of FAIS and FAIS-WY vary as  $n$ , the number of individuals, increases. Their speeds both appear to increase (approximately) linearly as  $n$  increases (but with different slopes).

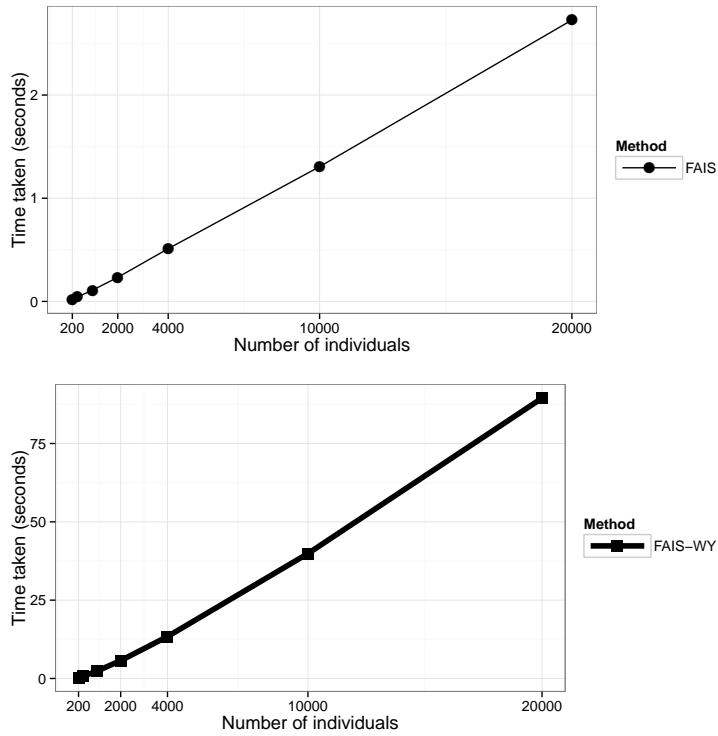

**Figure S4:** A figure comparing the speed of FAIS and FAIS-WY as the number of individuals varies. Note that the axes are NOT log-scaled. Other parameter values:  $L=1100$ ,  $J=100$ .

### S3.3 Accuracy

Figure S5 shows the proportion of correctly detected significant intervals for FAIS, FAISWY, BRUTE and UFE, for different values of  $p_{case}$ , as the length of the significant interval increases, averaged over  $M = 1000$  trials. It appears that the length of the significant interval does not appear to play too much of a role for the first three methods - for example, see panel  $p_{case} = 0.5$ , where the detection rates are fairly constant per method for FAIS, FAISWY and BRUTE. However, note that UFE performs poorly for longer intervals, for  $p_{case} < 0.9$ .

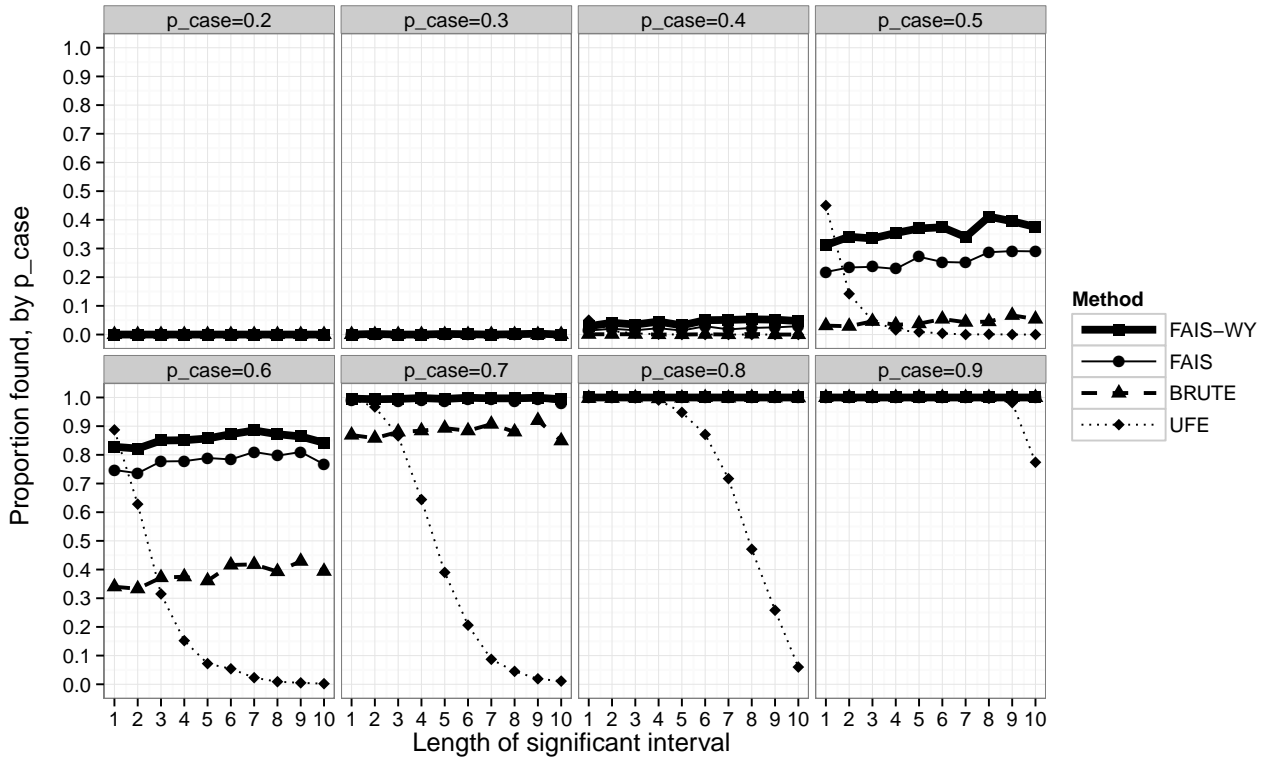

**Figure S5:** A figure comparing the accuracies of FAIS, FAIS-WY, BRUTE and UFE for different values of  $p_{case}$ , as the length of the significant interval increases. Other parameter values:  $n=100$ ,  $J=1000$ , number of  $M=1000$ .

Figure S6 (on the next page) shows the same information, with the roles of  $p_{case}$  and  $l$ , the length of the significant interval, exchanged. This figure more clearly shows that FAIS and FAISWY are significantly more accurate than BRUTE, and that UFE performs progressively worse as the length of significant intervals increases. This is to be expected, since UFE is only attempting to detect a significant difference in single SNPs. However, this figure decisively shows that, for detecting significant *intervals*, UFE is far inferior to interval-search methods.

Finally, Figure S7 shows the resulting False Discovery Rate (FDR) when FAIS and FAIS-WY are set to control the FWER at  $\alpha = 0.05$ . As expected, the FDR decreases with increasing  $p_{case}$ . This figure should be compared to Figure 4 in the main text which illustrates the difference in power between these four methods.

All simulations were performed on an iMac with CPU 2.9 Ghz Intel Core i5, and 16 GB of RAM (1600 MHz DDR3). Figures were produced in R using ggplot2.

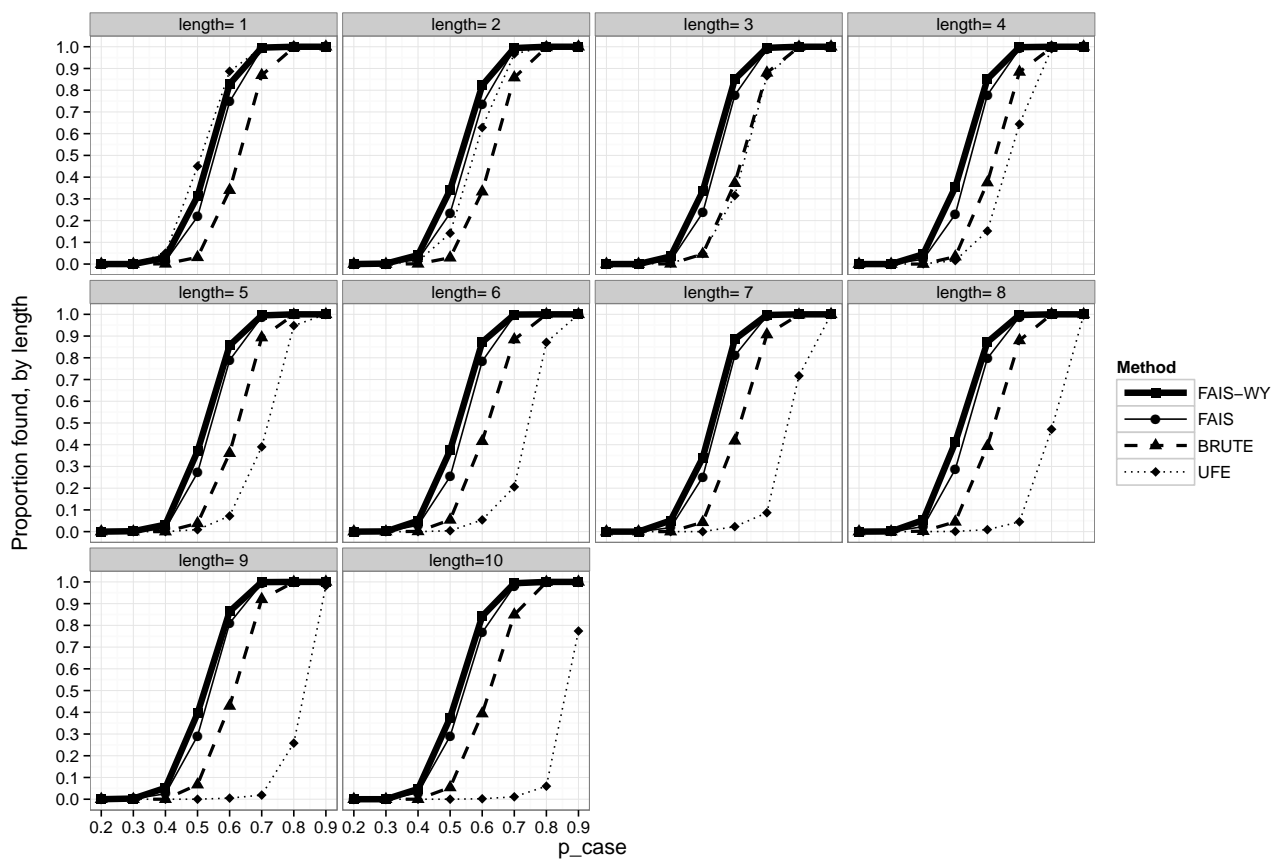

**Figure S6:** A figure comparing the accuracies of FAIS and FAIS-WY BRUTE and UFE for significant intervals of different lengths, as  $p_{case}$  varies. Other parameter values:  $n=100$ ,  $J=1000$ ,  $M=1000$ .

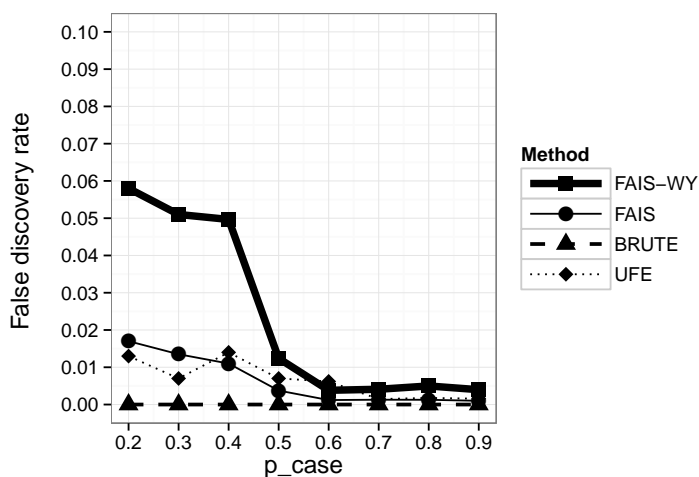

**Figure S7:** A figure showing the FDR of FAIS, FAISWY and BRUTE, as  $p_{case}$  varies. Other parameter values:  $n=100$ ,  $J=1000$ ,  $M=1000$ .
